# Supplementary material for: Ultrasensitive Photoelectrochemical Immunoassay Strategy Based on Bi2S3/Ag2S for the Detection of the Inflammation Marker Procalcitonin
Source: MDPI journal article supplement (doi:10.3390/bios13030366), 2023-03-10
Supplement: s1 [file s1]

# Ultrasensitive Photoelectrochemical Immunoassay Strategy Based on $\text{Bi}_2\text{S}_3/\text{Ag}_2\text{S}$ for the Detection of the Inflammation Marker Procalcitonin

## 1. Materials

Thioglycolic acid (TGA) was obtained from Macklin Reagent Co., Ltd. (Shanghai, China). 1-ethyl-3-(3-dimethylaminopropyl) carbodiimide hydrochloride (EDC) and N-hydroxysuccinimide (NHS) were obtained from Aladdin Reagent Database Inc. (Shanghai, China). Bismuth nitrate pentahydrate ( $\text{Bi}(\text{NO}_3)_3 \cdot 5\text{H}_2\text{O}$ ), sodium sulfide ( $\text{Na}_2\text{S}$ ), silver nitrate ( $\text{AgNO}_3$ ), ascorbic acid (AA), absolute ethanol, isopropyl alcohol and acetone were purchased from Sinopharm Chemical Reagent Co., Ltd. (Beijing, China). Phosphate buffered solution (PBS,  $1/15 \text{ mol} \cdot \text{L}^{-1} \text{ KH}_2\text{PO}_4$  and  $1/15 \text{ mol} \cdot \text{L}^{-1} \text{ Na}_2\text{HPO}_4$ ) containing AA was used as an electrolyte for the PEC measurements. All other chemicals in the experiment were analytical grade and were used as received without further purification.

## 2. Apparatus

Scanning electron microscope (SEM) images and energy dispersive spectroscopy (EDS) were obtained by using a field-emission SEM (Zeiss, Gemini 300, Germany). Electrochemical impedance spectroscopy (EIS) analysis was performed with an RST5200F electrochemical workstation (Zhengzhou Shiruisi Technology Co., Ltd, China) with a three-electrode system in a  $5.0 \text{ mmol} \cdot \text{L}^{-1} [\text{Fe}(\text{CN})_6]^{3-/4-}$  solution containing  $0.10 \text{ mol} \cdot \text{L}^{-1} \text{ KCl}$ . UV-vis diffuse reflectance spectrum measurements were performed with a Shimadzu UV-3101PC spectrometer (Japan). All PEC experiments were measured on a CHI760E electrochemical workstation (Chenhua Instrument Shanghai Co., Ltd, China) by using a conventional three-electrode system comprising of a saturated calomel electrode as reference electrode, a platinum wire as a counter-electrode, and the as-prepared  $\text{SnO}_2/\text{BiOI}/\text{Ag}_2\text{S}$  modified ITO electrode ( $2.5 \times 1.0 \text{ cm}^2$ ) as working electrode.

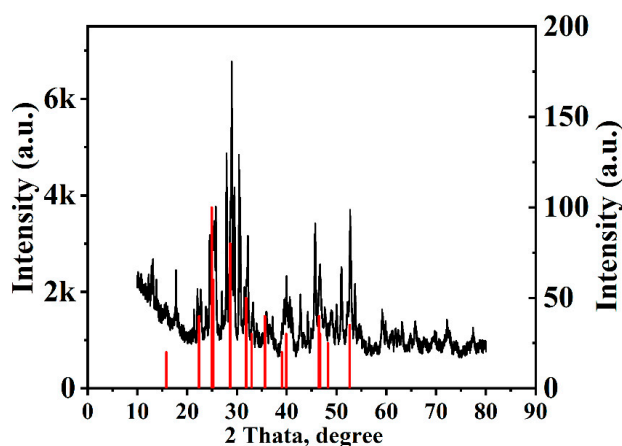

Figure S1. The XRD spectrum of  $\text{Bi}_2\text{S}_3$ .

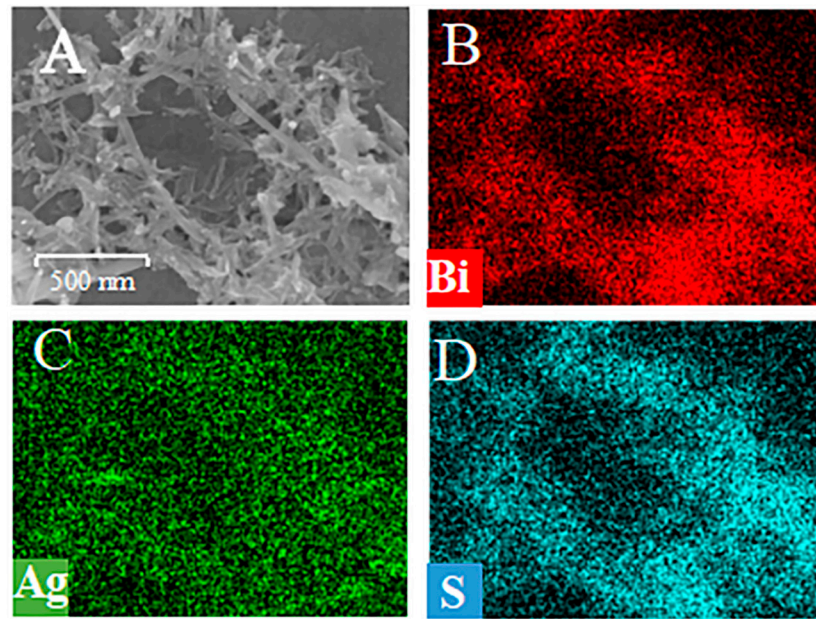

**Figure S2.** The SEM image of  $\text{Bi}_2\text{S}_3/\text{Ag}_2\text{S}$  composites (A); the corresponding EDS mapping images of  $\text{Bi}_2\text{S}_3/\text{Ag}_2\text{S}$  composites with elements of Bi (B), Ag (C), and S (D).

**Table S1.** Comparison for the performance of the proposed and referenced methods for PCT detection.

| Methods                                         | linear range<br>( $\text{ng mL}^{-1}$ ) | detection limit<br>( $\text{pg mL}^{-1}$ ) | References |
|-------------------------------------------------|-----------------------------------------|--------------------------------------------|------------|
| Electrochemical immunosensor                    | 0.001-100                               | 0.3                                        | 1          |
| Fiber optic nanogold-linked immunosorbent assay | 0.0001~50                               | 0.083                                      | 2          |
| A dual-mode PCT electrochemical immunosensor    | 0.001~100                               | 0.095                                      | 3          |
| Double antibody sandwich method                 | 0.1~10                                  | 250                                        | 4          |
| SERS magnetic immunoassay                       | 0~20                                    | 42                                         | 5          |
| Gold-based paper sensor                         | 0.49-13.90                              | 100                                        | 6          |
| Signal-Off ECL sensing model                    | 0.0005~50                               | 0.18                                       | This work  |

**Table S2.** The results of the PCT determination in human serum samples.

| Content in samples ( $\text{ng}\cdot\text{mL}^{-1}$ ) | Added content ( $\text{ng}\cdot\text{mL}^{-1}$ ) | Average content<br>( $n=11$ )<br>( $\text{ng}\cdot\text{mL}^{-1}$ ) | RSD ( $n=11$ , %) | Recovery (%) |
|-------------------------------------------------------|--------------------------------------------------|---------------------------------------------------------------------|-------------------|--------------|
| 0.100                                                 | 0.100                                            | 0.199                                                               | 3.6               | 90%          |
|                                                       | 0.200                                            | 0.298                                                               | 3.1               | 98%          |
| 0.500                                                 | 0.300                                            | 0.804                                                               | 4.1               | 101%         |
|                                                       | 0.600                                            | 1.013                                                               | 3.7               | 86 %         |

## References

(1) Miao, J.; Du, K.; Li, X.; Xu, X.; Dong, X.; Fang, J.; Cao, W.; Wei, Q. Ratiometric electrochemical immunosensor for the detection of procalcitonin based on the ratios of  $\text{SiO}_2\text{-Fc-COOH-Au}$  and  $\text{UiO-66-TB}$  complexes. *Biosens. Bioelectron.* **2021**, *171*, 112713.

- 
- (2) Li, Y.; Liu, L.; Liu, X.; Ren, Y.; Xu, K.; Zhang, N.; Sun, X.; Yang, X.; Ren, X.; Wei, Q. A dual-mode PCT electrochemical immunosensor with CuCo<sub>2</sub>S<sub>4</sub> bimetallic sulfides as enhancer,. *Biosens. Bioelectron.* **2020**, *163*, 112280.
- (3) Chiang, C.; Huang, T.; Wang, C.; Huang, C.; Tsai, T.; Yu, S.; Chen, Y.; Hong, S.; Hsu, C.; Chang, T. Fiber optic nanogold-linked immunosorbent assay for rapid detection of procalcitonin at femtomolar concentration level. *Biosens. Bioelectron.* **2020**, *151*, 111871.
- (4) Zhou, Y.; Shao, X.; Han, Y.; Zhang, H. Detection of procalcitonin (PCT) using the double antibody sandwich method based on fluorescence resonance energy transfer between upconversion nanoparticles and quantum dots. *Anal. Methods* **2018**, *10*, 1015-1022.
- (5) Wang, X.; Ma, L.; Hu, C.; Liu, T.; Sun, S.; Liu, X.; Guan, M. Simultaneous quantitative detection of IL-6 and PCT using SERS magnetic immunoassay with sandwich structure. *Nanotechnology* **2021**, *32*, 255702.
- (6) Xu, X.; Lei, X.; Ye, L.; Song, S.; Liu, L.; Xu, L.; Xu, C.; Hua, K. Gold-based paper sensor for sensitive detection of procalcitonin in clinical samples. *Chinese J. Anal. Chem.* **2022**, *50*, 100062.
